# Supplementary material for: Efficient and accurate causal inference with hidden confounders from genome-transcriptome variation data
Source: PLOS journal article supplement (doi:10.1371/journal.pcbi.1005703), 2017-08-18
Supplement: S4 (10.1371/journal.pcbi.1005703.s004) [file journal.pcbi.1005703.s004]

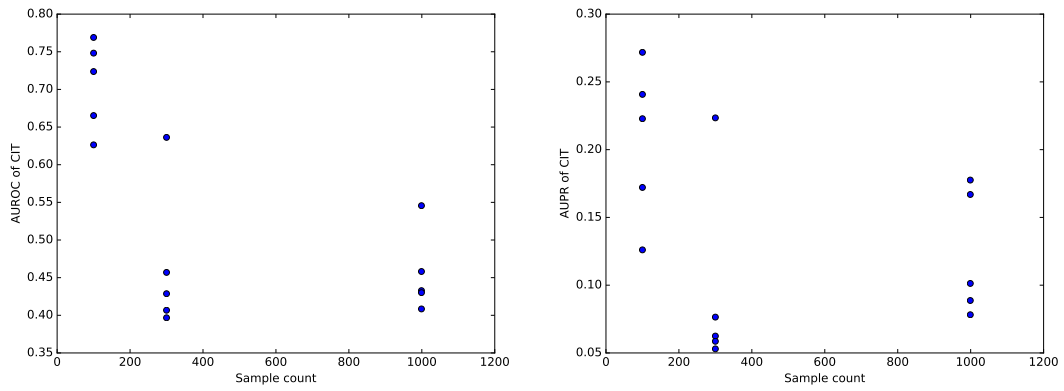

Figure S3: The AUROC and AUPR of CIT are shown for all 15 datasets of DREAM challenge. Every marker corresponds to the AUROC or AUPR of one dataset. CIT is an R package that includes the conditional independence test, along with tests 2 and 5, while also comparing  $E \rightarrow A \rightarrow B$  against  $E \rightarrow B \rightarrow A$ . The subsampling analysis on CIT was not feasible due to its low speed.
